# Supplementary material for: Neonatal Subcutaneous BCG Vaccination Decreases Atherosclerotic Plaque Number and Plaque Macrophage Content in ApoE−/− Mice
Source: MDPI journal article supplement (doi:10.3390/biology11101511), 2022-10-15
Supplement: s1 [file s1]

**Supplementary Table S2.** Overview of atherosclerosis model systems, diets, BCG (dose and form), delivery routes and effects on atherosclerosis. Chol, cholesterol; CFU, Colony Forming Units; BCG, Bacille Calmette-Guérin; s.c, subcutaneous; i.v., intravenous; i.n., intranasal; i.p., intraperitoneal; LDLR, Low-Density Lipoprotein Receptor; ApoE, Apolipoprotein E

| Model system              | Diet                                                    | Form of BCG            | Dose                                         | Delivery Route                                                                                                        | Effect on atherosclerosis (and time of measurement)                                                                                                                                              | Ref |
|---------------------------|---------------------------------------------------------|------------------------|----------------------------------------------|-----------------------------------------------------------------------------------------------------------------------|--------------------------------------------------------------------------------------------------------------------------------------------------------------------------------------------------|-----|
| Mouse LDLR-/- and ApoE-/- | Chow with 15% lard and 0.5% chol resp. Chow             | Extended freeze-drying | 100 ug                                       | 4-6 s.c. injections in base of tail                                                                                   | <b>30 weeks atherosclerosis</b><br>Reduced size of lesions<br>Reduced serum cytokines                                                                                                            | 9   |
| Mouse ApoE3Leiden.CETP    | Western diet 0.1% chol                                  | Live BCG, human dose   | 1 human dose $5 \times 10^6$ CFU             | Single i.v. injection                                                                                                 | <b>6 weeks atherosclerosis</b><br>Delayed lesion formation in aortic root<br>Reduces plasma non-HDL-c<br>Reduced foam cell formation                                                             | 10  |
| Mouse LDLR-/-             | Western diet (21%fat, 0.2%chol)                         | Live BCG               | $0.3-3 \times 10^6$ CFU                      | I.n.                                                                                                                  | <b>16 week atherosclerosis</b><br>Increased lesions (by Oil Red)<br>Increased CD4/CD8 T cell ratio                                                                                               | 11  |
| Yarkon Chicken            | Ad lib commercial feed (2% chol and 1% chol)            | Live BCG (Glaxo)       | 0.5 human dose                               | S.c. or i.p.<br>3 different timings:<br>(1) 8 weeks before diet, (2) Together with diet, (3) 5 weeks after diet start | <b>Chicken age 42</b><br>(1) IP No effect<br>(2) IP slight increase atherosclerosis<br>(3) IP decreased atherosclerosis<br>1. SC decreased atherosclerosis<br>2. SC No change<br>3. SC No change | 12  |
| New Zealand White rabbits | 1% cholesterol diet with adapt to maintain plasma chol. | Live BCG               | 1 + 0.5 human dose ( $4-13 \times 10^6$ CFU) | 2x s.c.                                                                                                               | <b>Injection at 12 weeks</b><br>Aortic IMT increase<br>Activated leukocytes                                                                                                                      | 13  |
| Mouse ApoE-/-             |                                                         | Heat killed BCG        | 0.01-1 mg                                    | I.p.                                                                                                                  | <b>2 weeks after BCG, 16-week old mice</b><br>1mg BCG increased calcified lesions<br>0.01mg no effect                                                                                            | 15  |
