# Supplementary material for: Neonatal Subcutaneous BCG Vaccination Decreases Atherosclerotic Plaque Number and Plaque Macrophage Content in ApoE−/− Mice
Source: MDPI journal article supplement (doi:10.3390/biology11101511), 2022-10-15
Supplement: s1 [file s1]

**Supplementary Table S1**

| <b>Cause of death</b>                            | <b>Group</b> |
|--------------------------------------------------|--------------|
| Pups eaten by mother (n=2)                       | Saline       |
| Malocclusions (n=1)                              | Saline       |
| Distended abdomen due to bowel obstruction (n=1) | Saline       |
| Hydrocephalus (n=1)                              | BCG          |
| Found dead in cage (n=1)                         | Saline       |

Suppl table S1. Summary of exclusion of mice before 16 weeks.
