# Supplementary material for: Neonatal Subcutaneous BCG Vaccination Decreases Atherosclerotic Plaque Number and Plaque Macrophage Content in ApoE−/− Mice
Source: MDPI journal article supplement (doi:10.3390/biology11101511), 2022-10-15
Supplement: s1 [file s1]

## Major Resources Table

In order to allow validation and replication of experiments, all essential research materials listed in the Methods should be included in the Major Resources Table below. Authors are encouraged to use public repositories for protocols, data, code, and other materials and provide persistent identifiers and/or links to repositories when available. Authors may add or delete rows as needed.

### Animals (in vivo studies)

| Species                   | Vendor or Source | Background Strain | Sex                  | Persistent ID / URL |
|---------------------------|------------------|-------------------|----------------------|---------------------|
| ApoE <sup>-/-</sup> Mouse | Jackson          | C57Bl/6/J         | Both Male and Female |                     |

### Antibodies

| Target antigen                           | Vendor or Source    | Catalog # | Working concentration | Persistent ID / URL                                                                                                                                                                             |
|------------------------------------------|---------------------|-----------|-----------------------|-------------------------------------------------------------------------------------------------------------------------------------------------------------------------------------------------|
| Rat monoclonal (Cl:A3-1)anti Mouse F4/80 | Abcam               | Ab6640    | 0,05 mg/ml            | <a href="https://www.abcam.com/f480-antibody-cia3-1-macrophage-marker-ab6640.html">https://www.abcam.com/f480-antibody-cia3-1-macrophage-marker-ab6640.html</a>                                 |
| Goat anti Rat IgG, mouse adsorbed        | Vector Laboratories | BA-9401   | 1 ug/ml               | <a href="https://vectorlabs.com/products/antibodies/biotinylated-goat-anti-rat-igg-mouse-adsorbed">https://vectorlabs.com/products/antibodies/biotinylated-goat-anti-rat-igg-mouse-adsorbed</a> |

### Other

| Description                             | Source / Repository                                | Persistent ID / URL                                                                                                                     |
|-----------------------------------------|----------------------------------------------------|-----------------------------------------------------------------------------------------------------------------------------------------|
| Western fast food diet                  | Specialty feeds Australia; SF00-219                | <a href="https://www.specialtyfeeds.com/diets/sf00-219/">https://www.specialtyfeeds.com/diets/sf00-219/</a>                             |
| Middlebrook 7H9 Broth Base              | Sigma-Aldrich; M0178                               | <a href="https://www.sigmaaldrich.com/NL/en/product/sial/m0178">https://www.sigmaaldrich.com/NL/en/product/sial/m0178</a>               |
| Middlebrook ADC growth supplement (10%) | Sigma-Aldrich; M0553                               | <a href="https://www.sigmaaldrich.com/NL/en/product/sial/m0553">https://www.sigmaaldrich.com/NL/en/product/sial/m0553</a>               |
| Cholesterol E test                      | Fujifilm Wako Pure Chemical Corporation; 439-17501 |                                                                                                                                         |
| Triglyceride E test                     | Fujifilm Wako Pure Chemical corporation; 432-40201 |                                                                                                                                         |
| Dextralip 50                            | Sigma-Aldrich; D8787-1G                            | <a href="https://www.sigmaaldrich.com/NL/en/product/sial/d8787">https://www.sigmaaldrich.com/NL/en/product/sial/d8787</a>               |
| Mayer's Hematoxylin Solution            | Amber Scientific; 24821-500                        | <a href="https://www.polysciences.com/german/mayers-hematoxylin-40779">https://www.polysciences.com/german/mayers-hematoxylin-40779</a> |
| Eosin 1% Aqueous Solution               | Amber Scientific                                   |                                                                                                                                         |
| Oil Red O working solution              | Sigma Aldrich #MAK194                              |                                                                                                                                         |
| Fluorescence Mounting Medium            | Dako #S3022380-2                                   |                                                                                                                                         |
| Fiji software                           | Image J version 2.0                                |                                                                                                                                         |
| 3% H2O2 peroxidase blocking solution    | Dako S2023                                         |                                                                                                                                         |
| Serum-free protein block                | Dako, X0909                                        |                                                                                                                                         |
| Wash buffer immunohistochemistry        | Dako K8024                                         |                                                                                                                                         |

DOI [to be added]

|                                   |                       |  |
|-----------------------------------|-----------------------|--|
| Streptavidin HRP                  | Dako P0397            |  |
| DAB chromogen in substrate buffer | Dako K5007            |  |
| Haematoxylin                      | Dako, S3301           |  |
| Leica CV mount                    | Leica,<br>14046430011 |  |
