# Supplementary material for: Neonatal Subcutaneous BCG Vaccination Decreases Atherosclerotic Plaque Number and Plaque Macrophage Content in ApoE−/− Mice
Source: Biology (Basel). 2022 Oct 15;11(10):1511. doi: 10.3390/biology11101511 (PMC9599032; doi:10.3390/biology11101511)
Supplement: Supplementary file 1 [file biology-11-01511-s001.zip]

Archive with 4 entries (4 files):
- KeyResourcesTable_Bekkering.pdf
- Supplementary  Figure S1_sex differences.pdf
- Supplementary Table S1.pdf
- Supplementary Table S2.pdf
