# Supplementary figures and images for: Neonatal Subcutaneous BCG Vaccination Decreases Atherosclerotic Plaque Number and Plaque Macrophage Content in ApoE−/− Mice
Source: MDPI journal article supplement (doi:10.3390/biology11101511), 2022-10-15

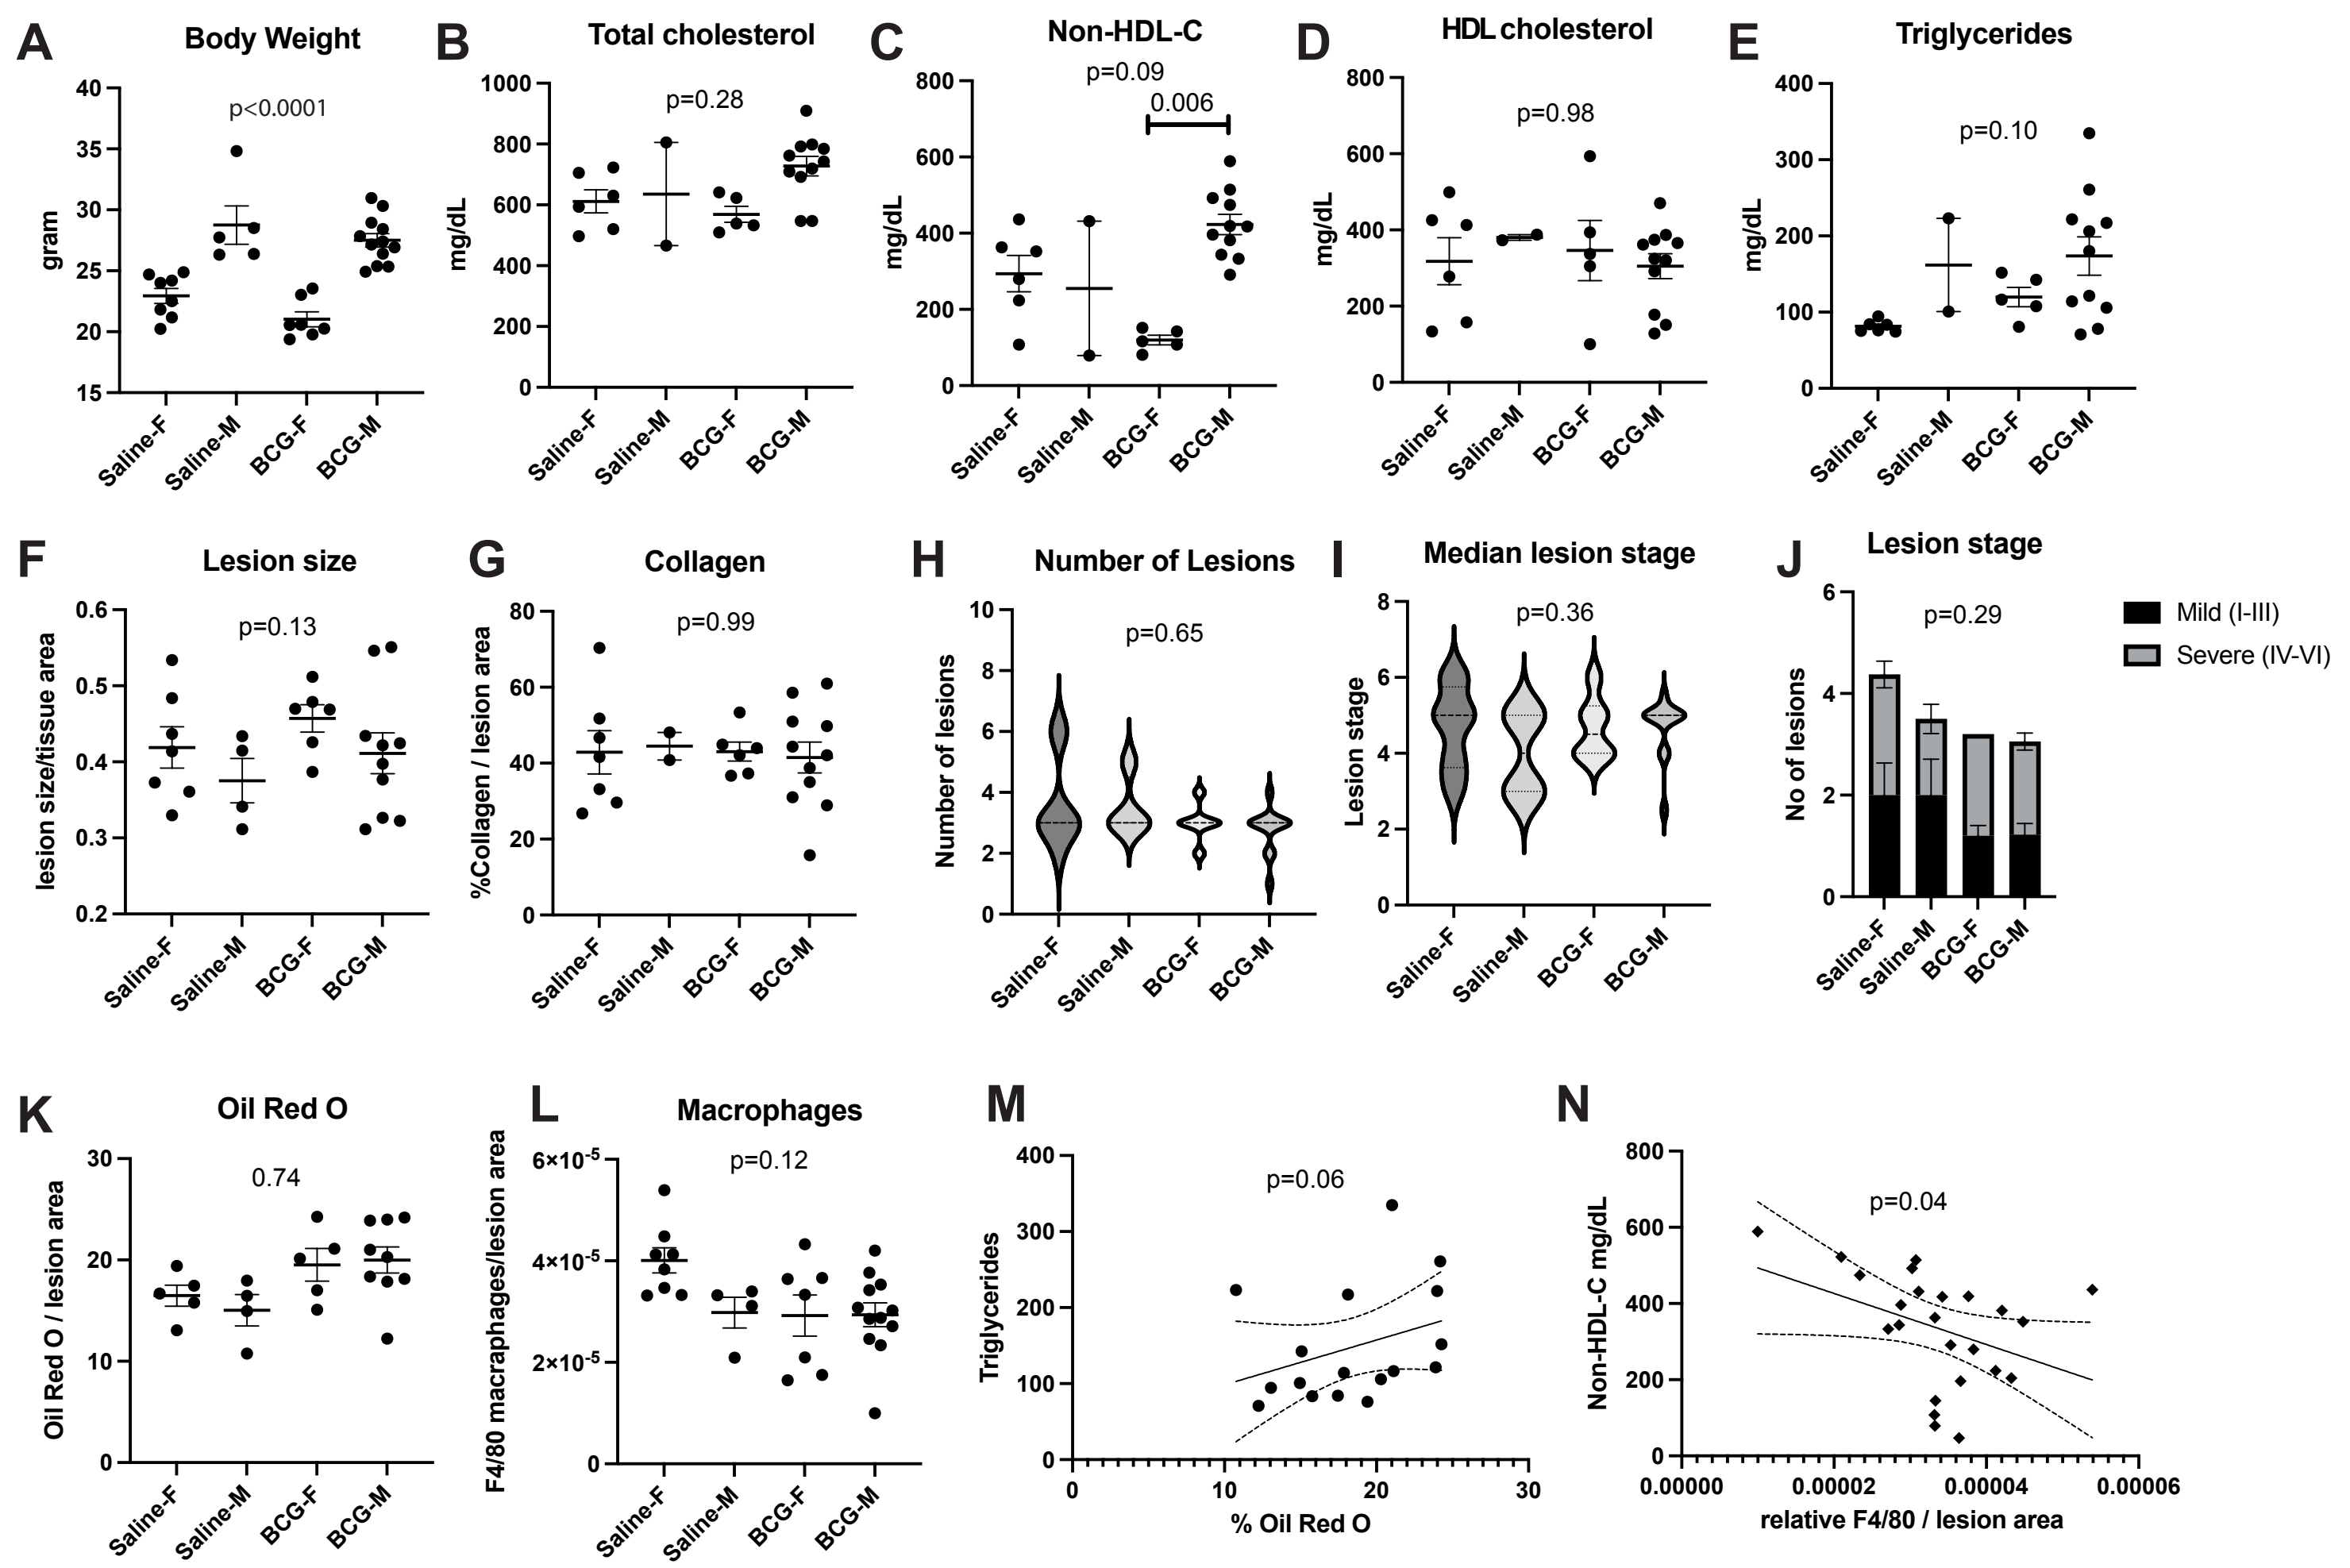

Supplement: s1 [file s1]
